# Supplementary material for: Preparation and Characterization of Carbon Paste Electrode Bulk-Modified with Multiwalled Carbon Nanotubes and Its Application in a Sensitive Assay of Antihyperlipidemic Simvastatin in Biological Samples
Source: MDPI journal article supplement (doi:10.3390/molecules24122215), 2019-06-13
Supplement: s1 [file s1]

# Preparation and characterization of carbon paste electrode bulk modified with multiwalled carbon nanotubes and its application in sensitive assay of antihyperlipidemic simvastatin in biological samples

Amir M. Ashrafi, Lukáš Richtera \*

Faculty of Electrical Engineering and Communication, Department of Microelectronics, Brno University of Technology, Technická 3058/10, CZ-616 00 Brno, Czech Republic;  
amirmansoor.ashrafi@mendelu.cz (A.M.A.); richtera@mendelu.cz (L.R.)

\* Correspondence: richtera@mendelu.cz; Tel.: +420-545-133-311

Received: date; Accepted: date; Published: date

Supplementary Materials:

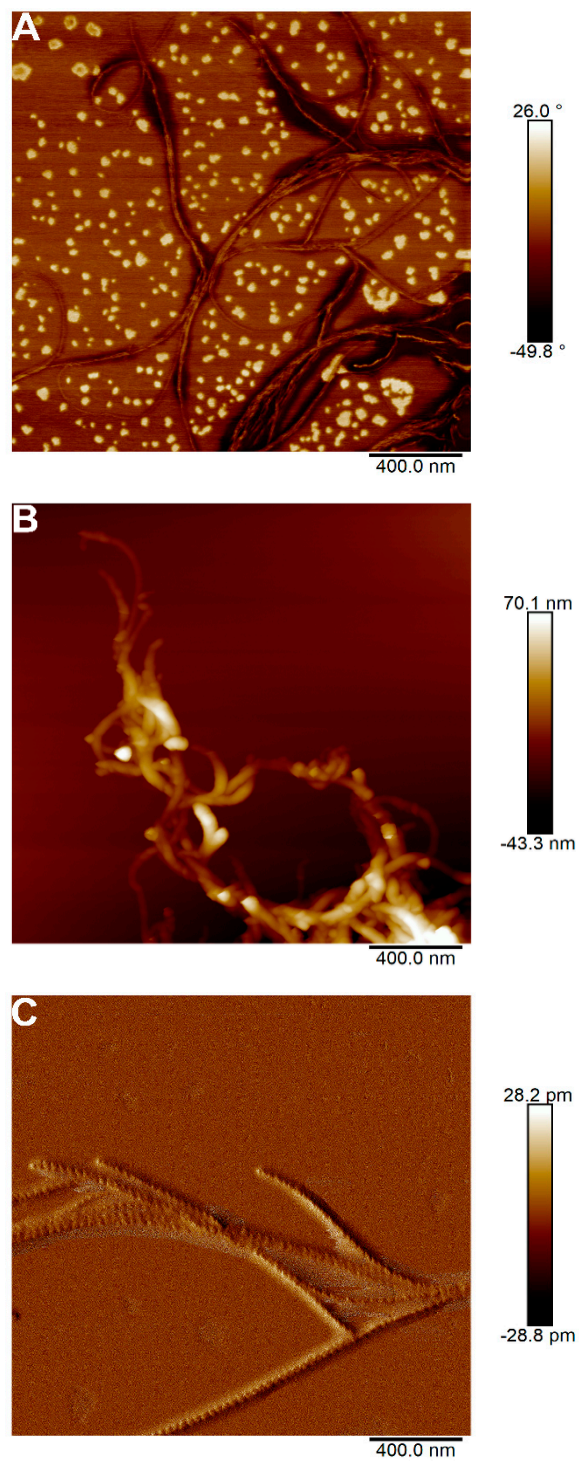

**Figure 1.** The obtained 2D AFM images of the prepared MW-CPE, A: MW-CPE 15%, B: MW-CPE 25%, and C: MW-CPE 35 %.

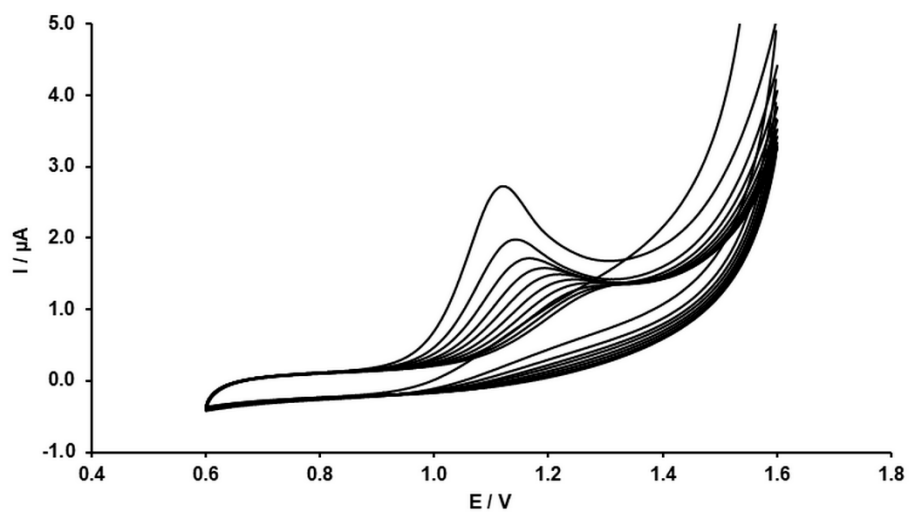

**Figure 2.** Ten repetitive CVs of  $5 \times 10^{-4}$  M of SIM in 0.1 M  $\text{H}_2\text{SO}_4$ , scan rate  $50 \text{ mV s}^{-1}$ .

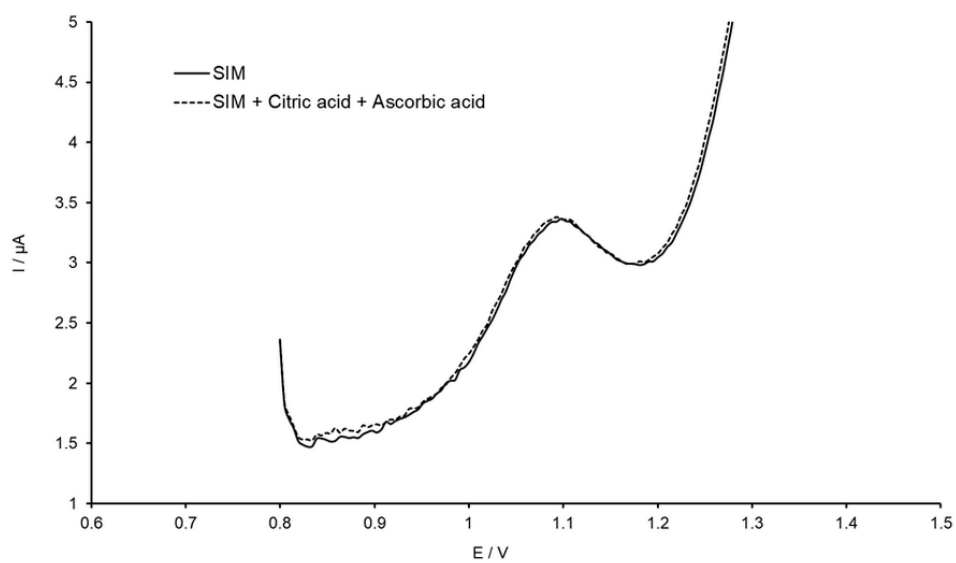

**Figure 3.** DPVs of solution of  $5 \mu\text{M}$  of SIM in without and in presence of  $5 \times 10^{-4}$  M of ascorbic acid and citric acid.
